# Supplementary material for: Size-matching hierarchical micropillar arrays for detecting circulating tumor cells in breast cancer patients’ whole blood
Source: Royal Society of Chemistry journal article supplement (doi:10.1039/c9nr00173e), 2019-01-01
Supplement: c9nr00173e1.pdf [file c9nr00173e1.pdf]

***Electronic Supplementary Information (ESI) for Nanoscale***

**Size-matching hierarchical micropillar arrays for detecting circulating tumor cells in breast cancer patients' whole blood**

*Zhongshun Wang,<sup>a</sup> Daren Xu,<sup>a</sup> Xuekui Wang,<sup>b</sup> Yue Jin,<sup>c</sup> Bo Huo,<sup>c</sup> Yalei Wang,<sup>a</sup> Chengyan He,<sup>b</sup> Xueqi Fu<sup>\*c</sup> and Nan Lu<sup>\*a</sup>*

<sup>a</sup>State Key Laboratory of Supramolecular Structure and Materials, College of Chemistry, Jilin University, Changchun, 130012, P. R. China. Email: luenan@jlu.edu.cn; Fax: +86 0431-85168477

<sup>b</sup>Department of Breast Surgery, China-Japan Union Hospital of Jilin University, Changchun, 130033, P. R. China

<sup>c</sup>College of Life Sciences, Jilin University, Changchun, 130012, P. R. China. Email: fxq@jlu.edu.cn

### ***Table of content***

1. Proving anti-EpCAM was successfully modified on the substrates.
2. SEM images of PDMS substrates with different period.
3. SEM images of PDMS-1 substrates with different heights.
4. SEM images and fluorescence micrographs of MCF-7 cells captured on the anti-EpCAM/PDMS-1.
5. Capture efficiency of EpCAM positive cell lines (MCF-7 and A549) and EpCAM negative cell lines (HeLa and Daudi) on anti-EpCAM/PDMS-1.
6. Capture efficiency of MCF-7 cells with different concentrations spiked into human whole blood.
7. The information of breast cancer patients.

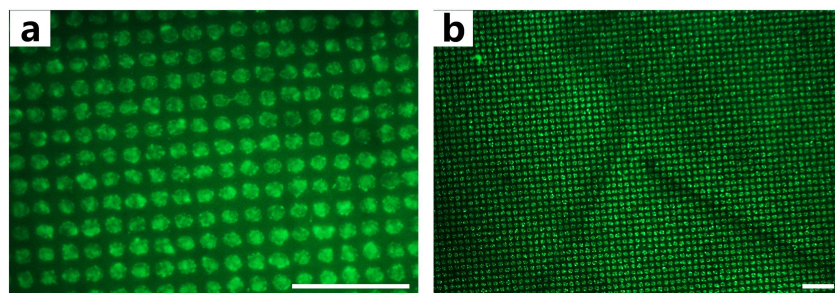

**Fig. S1** Fluorescence micrographs of anti-EpCAM/PDMS-1 after the incubation with FITC-labeled goat antimouse secondary antibody. The scale bars are 100  $\mu\text{m}$ .

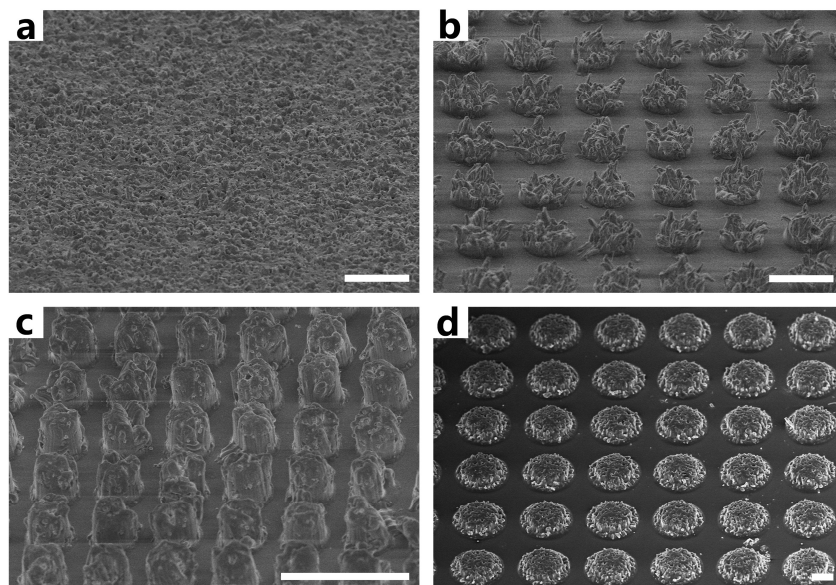

**Fig. S2** SEM images of (a) RPDMS, (b) PDMS-1, (c) PDMS-2, and (d) PDMS-3 at 45° stage tilt angles. The scale bars are 20  $\mu\text{m}$ .

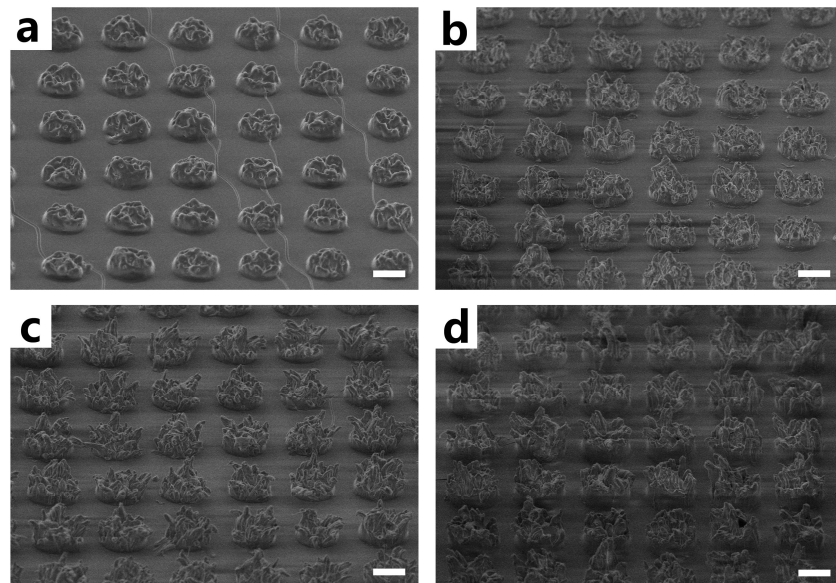

**Fig. S3** SEM images of PDMS-1 of different heights at 45° stage tilt angles. The height of PDMS-1 is 6, 8, 10, 12  $\mu\text{m}$ , in sequence. The scale bars are 10  $\mu\text{m}$ .

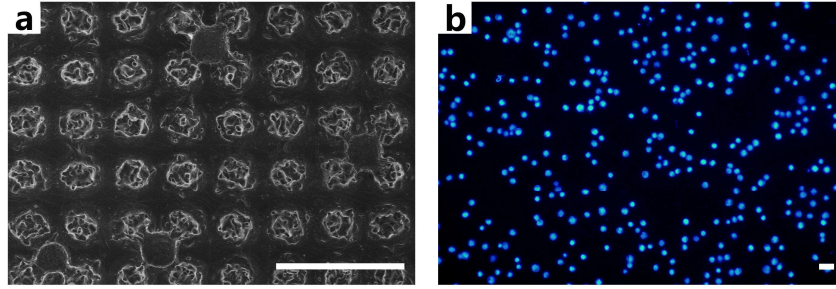

**Fig. S4** (a) SEM image and (b) Fluorescence micrograph of MCF-7 cells captured on anti-EpCAM/PDMS-1. The scale bars are 50  $\mu$ m.

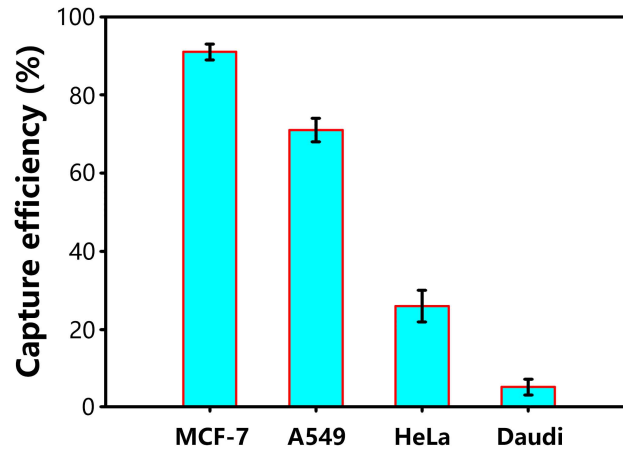

**Fig. S5** Capture efficiency of EpCAM positive cell lines (MCF-7 and A549) and EpCAM negative cell lines (HeLa and Daudi) on anti-EpCAM/PDMS-1. The error bars represent one standard deviation (n=5).

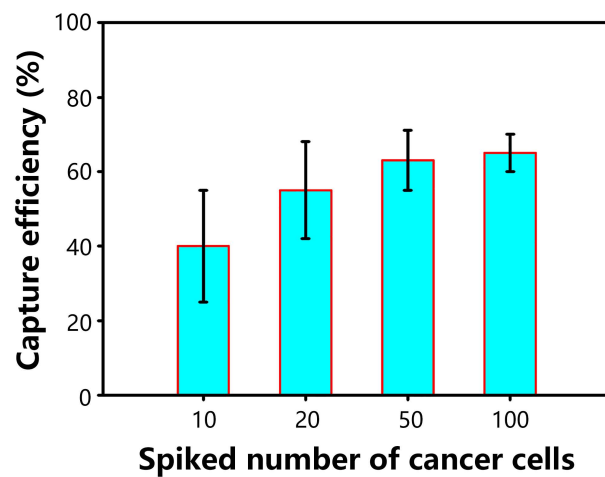

**Fig. S6** Capture efficiency of spiked MCF-7 cells in the artificial whole blood on anti-EpCAM/PDMS-1. The capture efficiency is in the range of 40% to 65% when the concentrations ranging from 10 to 100 cells  $\text{mL}^{-1}$ . The error bars represent one standard deviation ( $n=5$ ).

**Table S1** The information of breast cancer patients.

| Patient number | Cancer type   | Age | Gender | TNM grouping <sup>a</sup> | Stage <sup>a</sup> | CTC number (1mL blood) |
|----------------|---------------|-----|--------|---------------------------|--------------------|------------------------|
| 1              | Breast cancer | 39  | Female | T1 N0 M0                  | I A                | 2                      |
| 2              | Breast cancer | 45  | Female | T4 N2 M0                  | III B              | 8                      |
| 3              | Breast cancer | 35  | Female | T1 N1 M0                  | II A               | 3                      |
| 4              | Breast cancer | 49  | Female | T4 N3 M0                  | III C              | 14                     |
| 5              | Breast cancer | 45  | Female | T1 N0 M0                  | I A                | 1                      |
| 6              | Breast cancer | 39  | Female | T1 N0 M0                  | I A                | 0                      |
| 7              | Breast cancer | 47  | Female | T1 N1 M0                  | II A               | 3                      |
| 8              | Breast cancer | 41  | Female | T1 N1 M0                  | II A               | 2                      |
| 9              | Breast cancer | 32  | Female | T1 N1mi M0                | I B                | 2                      |
| 10             | Breast cancer | 79  | Female | T2 N1 M0                  | II B               | 4                      |
| 11             | Breast cancer | 42  | Female | T2 N2 M0                  | III A              | 6                      |
| 12             | Breast cancer | 41  | Female | T1 N2 M0                  | III A              | 5                      |
| 13             | Breast cancer | 69  | Female | T2 N1 M0                  | II B               | 4                      |
| 14             | Breast cancer | 58  | Female | T2 N0 M0                  | II A               | 0                      |
| 15             | Breast cancer | 50  | Female | T1 N1 M0                  | II A               | 1                      |
| 16             | Breast cancer | 43  | Female | T2 N2 M0                  | III A              | 2                      |
| 17             | Breast cancer | 47  | Female | T1 N0 M0                  | I A                | 0                      |
| 18             | Breast cancer | 40  | Female | T2 N1 M0                  | II B               | 5                      |
| 19             | Breast cancer | 62  | Female | T2 N2 M0                  | III A              | 7                      |
| 20             | Breast cancer | 43  | Female | T3 N0 M0                  | II B               | 6                      |
| 21             | Breast cancer | 55  | Female | T3 N0 M0                  | II B               | 2                      |
| 22             | Breast cancer | 61  | Female | T2 N2 M0                  | III A              | 3                      |
| 23             | Breast cancer | 56  | Female | T2 N2 M0                  | III A              | 6                      |
| 24             | Breast cancer | 66  | Female | T3 N0 M0                  | II B               | 3                      |
| 25             | Breast cancer | 49  | Female | T3 N1 M0                  | III A              | 5                      |

<sup>a</sup> TNM staging system: The TNM Classification of Malignant Tumors (TNM) is a cancer staging notation system that gives codes to describe the stage of a person's cancer, when this originates with a solid tumor. T describes the size of the original (primary) tumor and whether it has invaded nearby tissue, N describes nearby (regional) lymph nodes that are involved, M describes distant metastasis (spread of cancer from one part of the body to another).
